# Supplementary material for: Quantifying the emission changes and associated air quality impacts during the COVID-19 pandemic on the North China Plain: a response modeling study
Source: Copernicus journal article supplement (doi:10.5194/acp-20-14347-2020), 2020-11-25
Supplement: Supplementary file 2 [file acp-20-14347-2020-supplement.pdf]

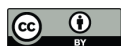

*Supplement of*

## **Quantifying the emission changes and associated air quality impacts during the COVID-19 pandemic on the North China Plain: a response modeling study**

**Jia Xing et al.**

*Correspondence to:* Shuxiao Wang (shxwang@tsinghua.edu.cn) and Siwei Li (siwei.li@whu.edu.cn)

The copyright of individual parts of the supplement might differ from the CC BY 4.0 License.

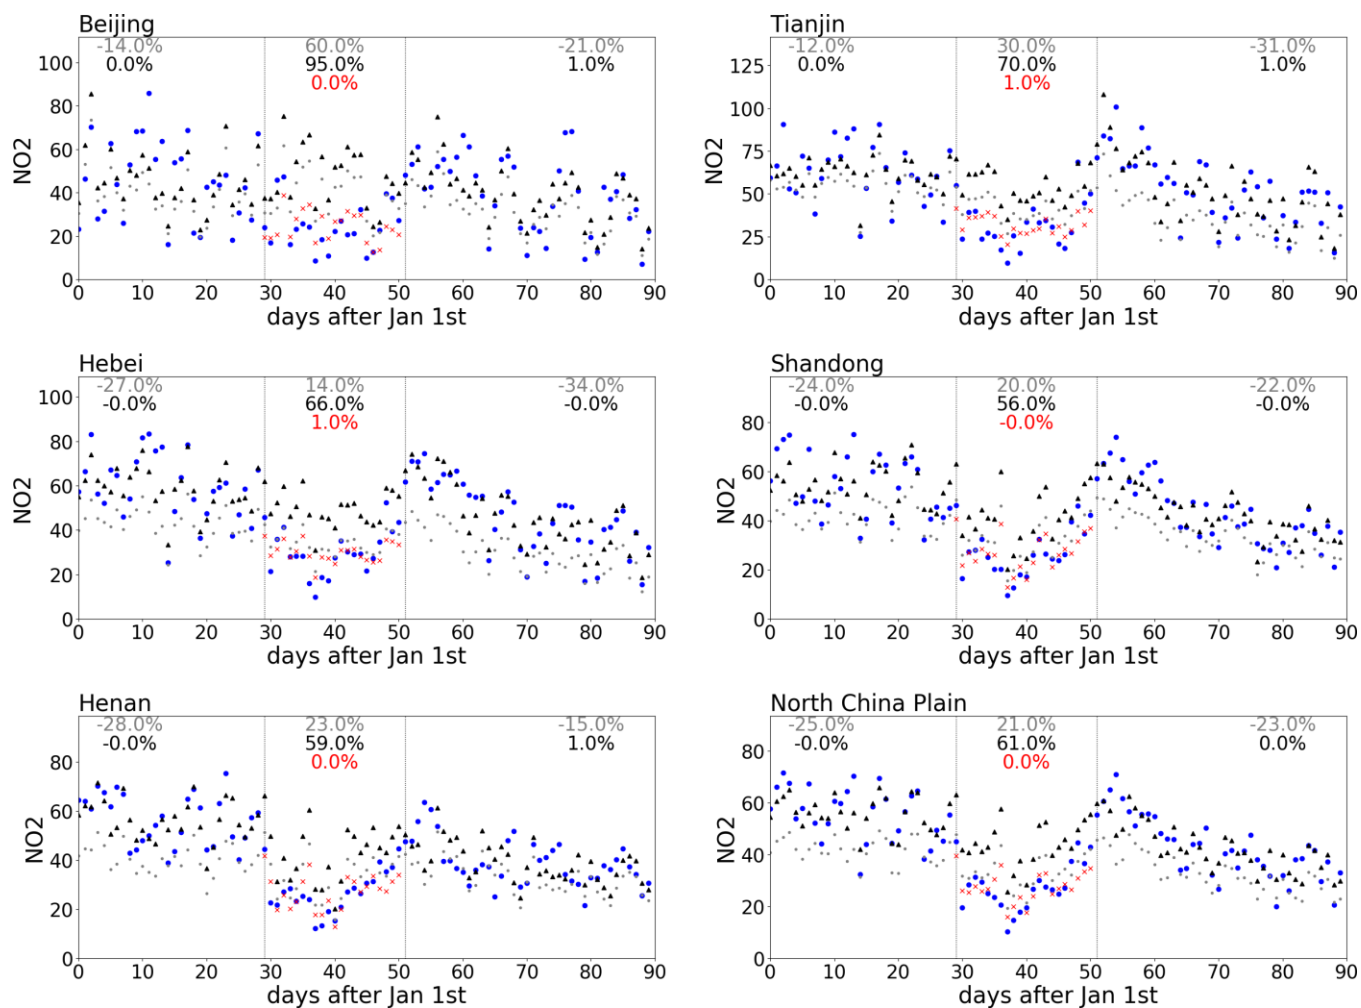

**Figure S1** Comparison of the simulated average concentrations of NO<sub>2</sub> in NCP (the percentage numbers indicate the normalized mean biases in hypothesis and actual simulations respectively for Period 2. Blue dots: observations; Black dots: simulations using adjusted emission with no consideration of shutdown influences; Red dots: simulations using adjusted emission with consideration of shutdown influences; Grey dots: original simulation without assimilation; unit:  $\mu\text{g m}^{-3}$ )

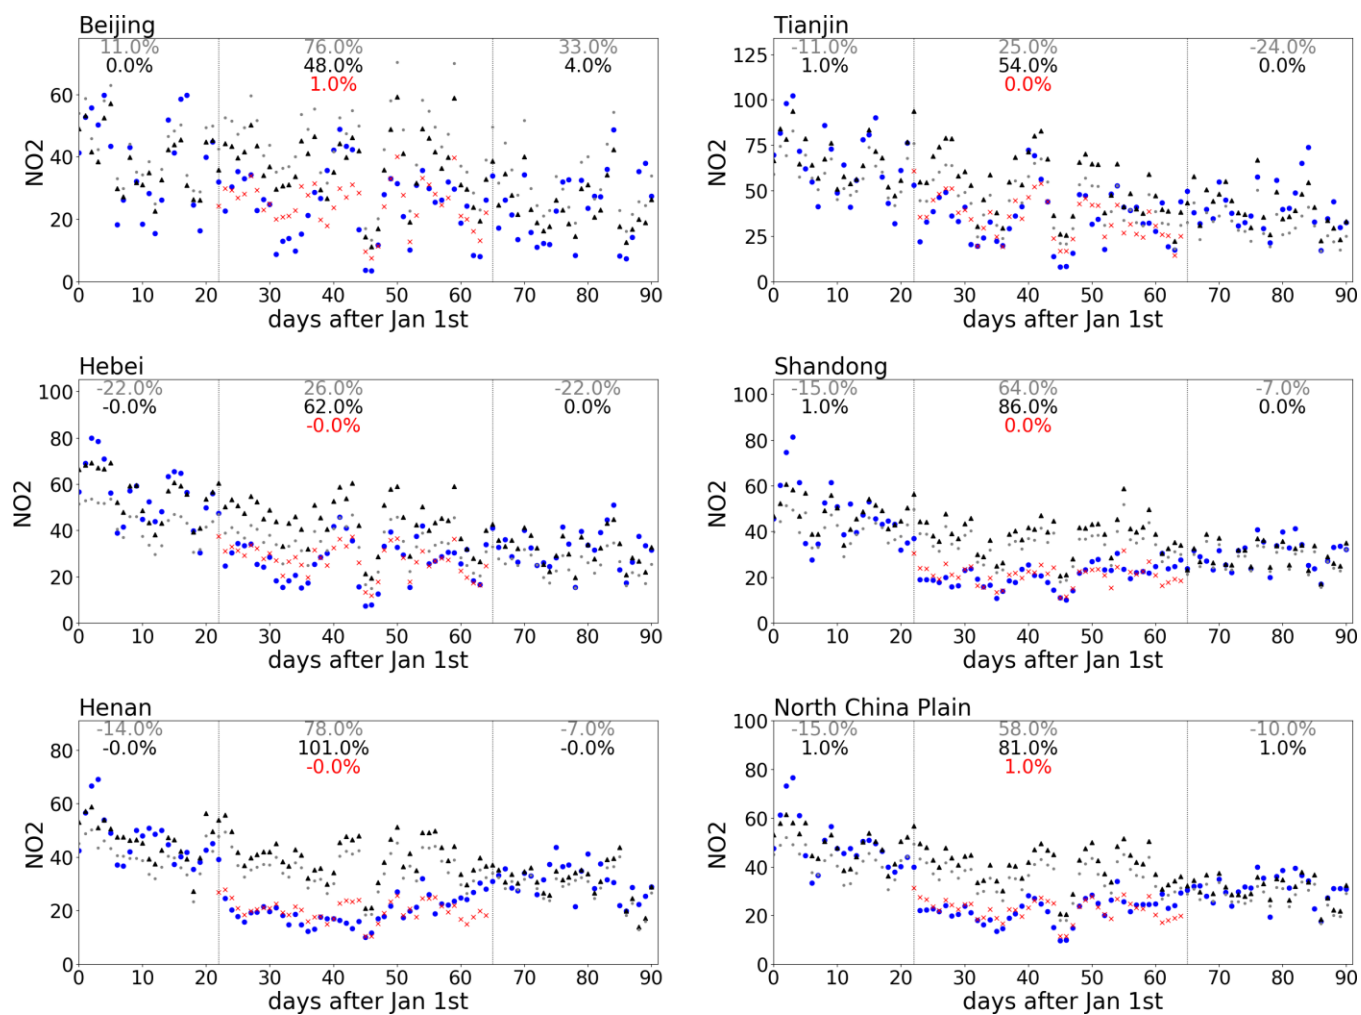

**Figure S2** Same as Figure S1 but in 2020

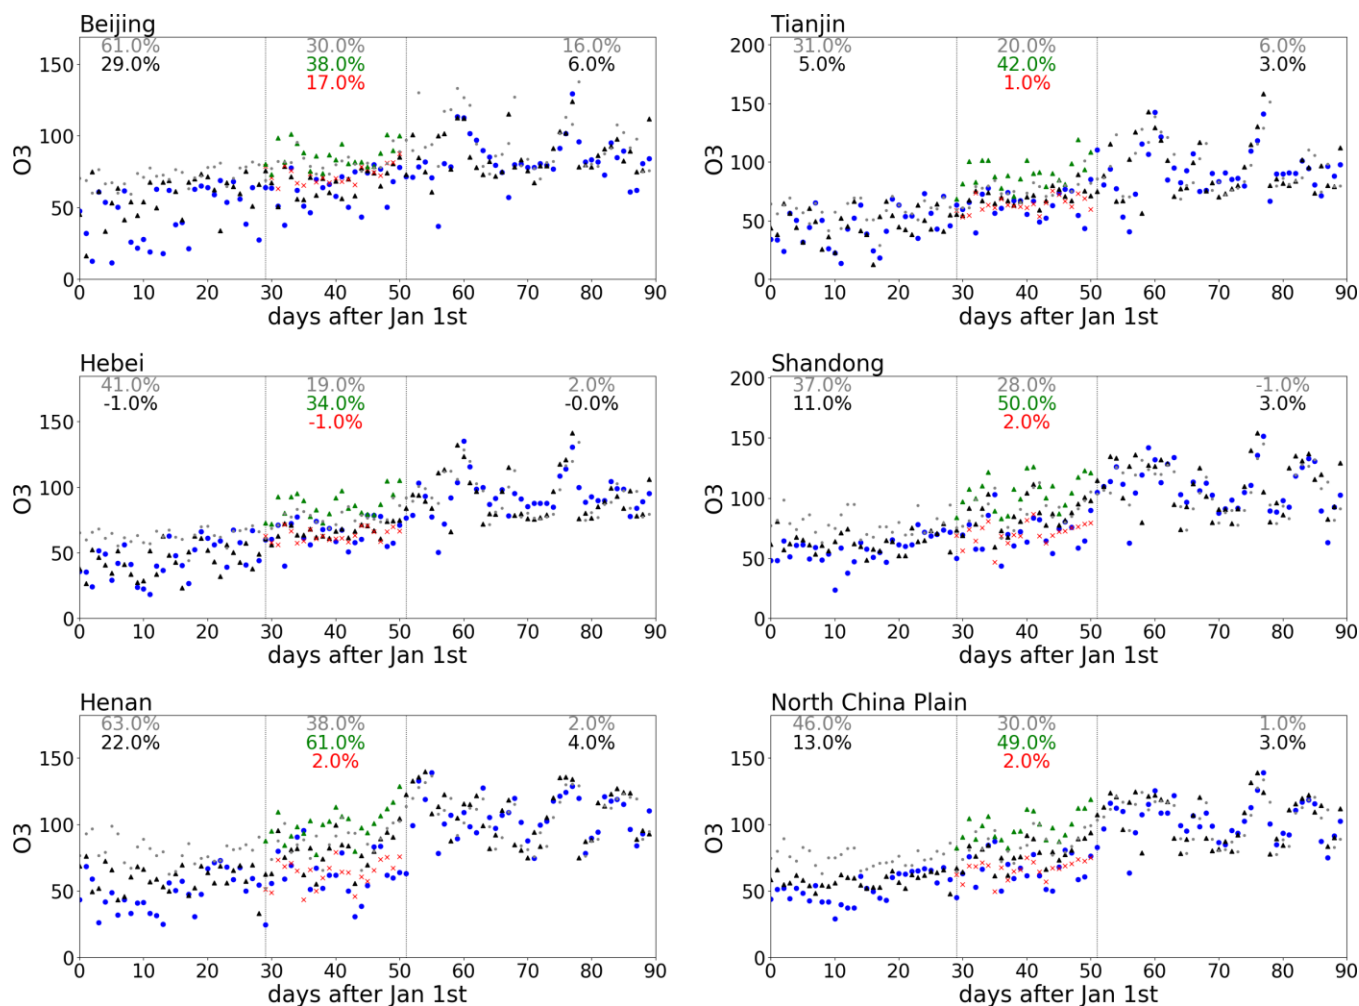

**Figure S3** Comparison of the simulated average concentrations of  $O_3$  in NCP (the percentage numbers indicate the normalized mean biases in hypothesis and actual simulations respectively for Period 2. Blue dots: observations; Black dots: simulations using adjusted emission with no consideration of shutdown influences; Red dots: simulations using adjusted emission with consideration of shutdown influences; Green dots: simulations using adjusted emission with consideration of shut-down influences but without VOC; Grey dots: original simulation without assimilation; unit:  $\mu g m^{-3}$ )

22

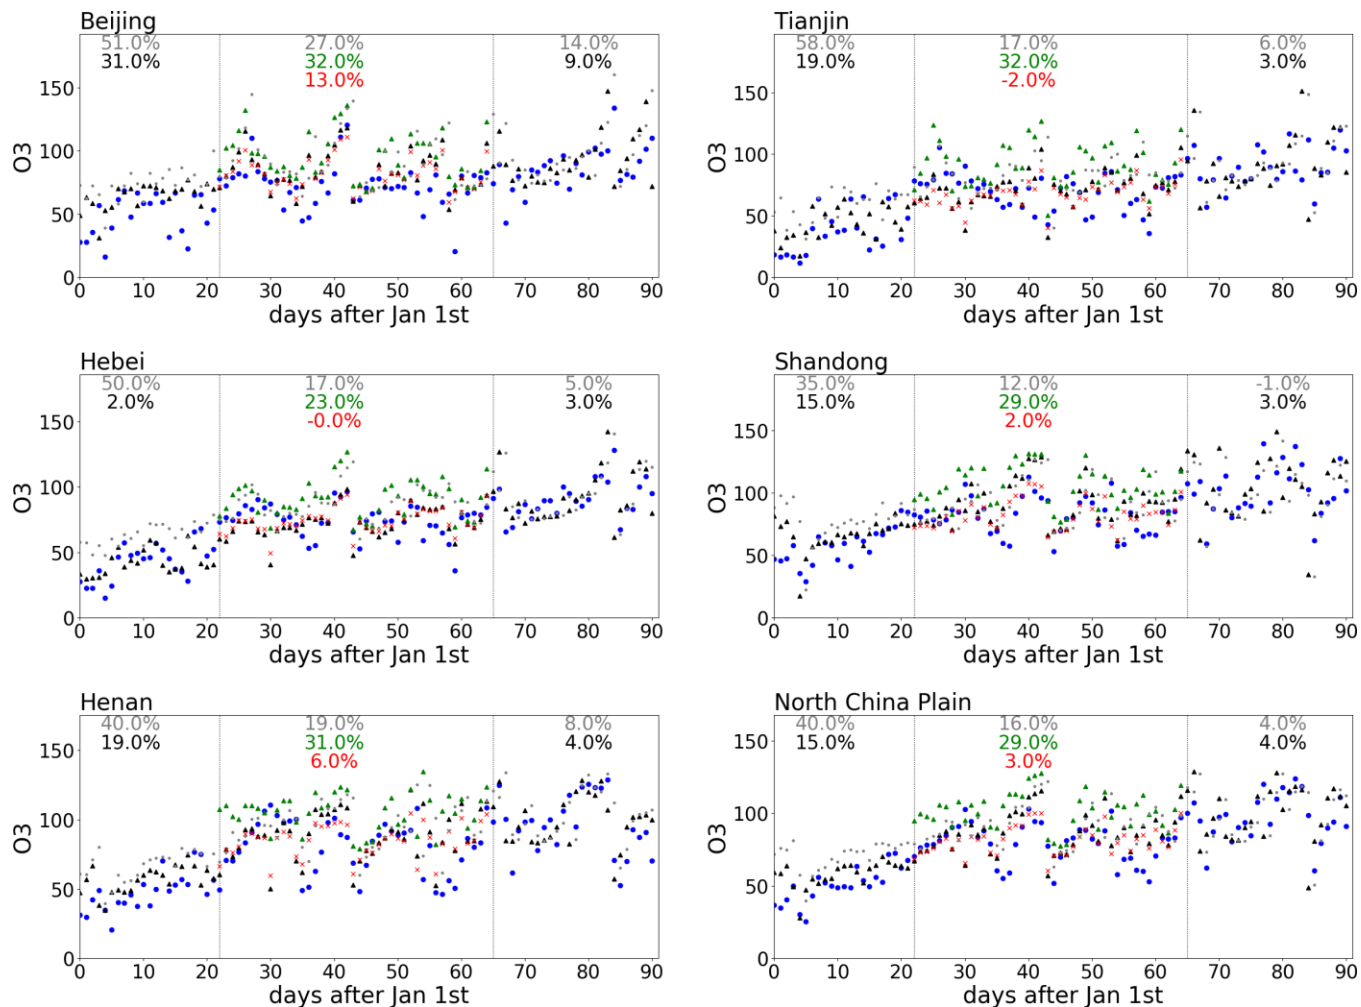

23

24

**Figure S4** Same as Figure S3 but in 2020

25

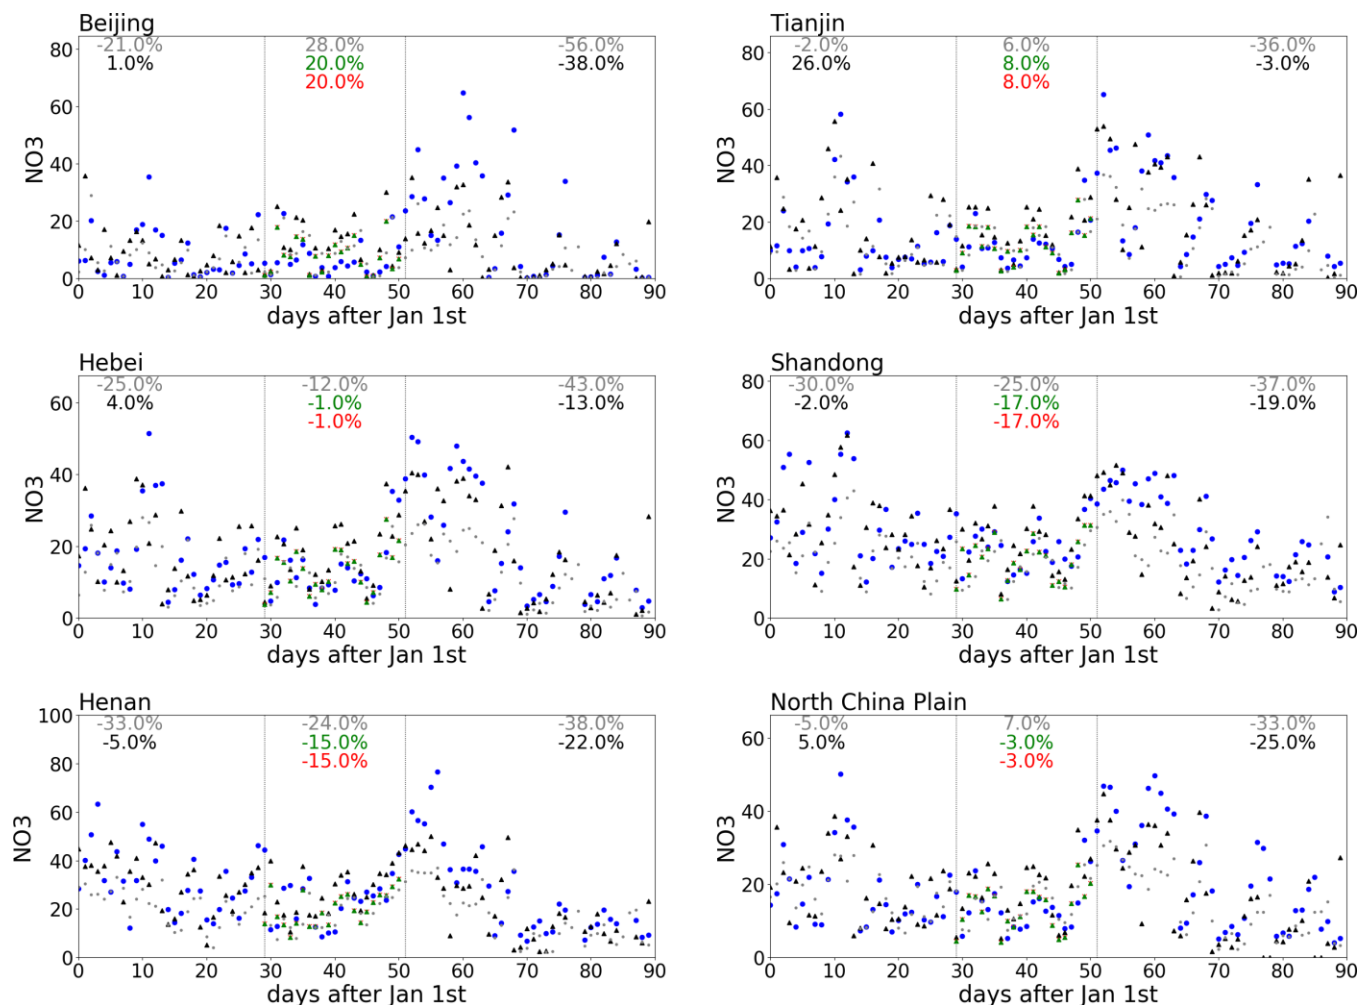

27

28 **Figure S5** Comparison of the simulated average concentrations of  $\text{NO}_3^-$  in NCP (the percentage numbers  
 29 indicate the normalized mean biases in hypothesis and actual simulations respectively for Period 2. Blue  
 30 dots: observations; Black dots: simulations using adjusted emission with no consideration of shutdown  
 31 influences; Red dots: simulations using adjusted emission with consideration of shutdown influences;  
 32 Green dots: simulations using adjusted emission with consideration of shut-down influences but  
 33 without  $\text{NH}_3$ ; Grey dots: original simulation without assimilation; unit:  $\mu\text{g m}^{-3}$ )

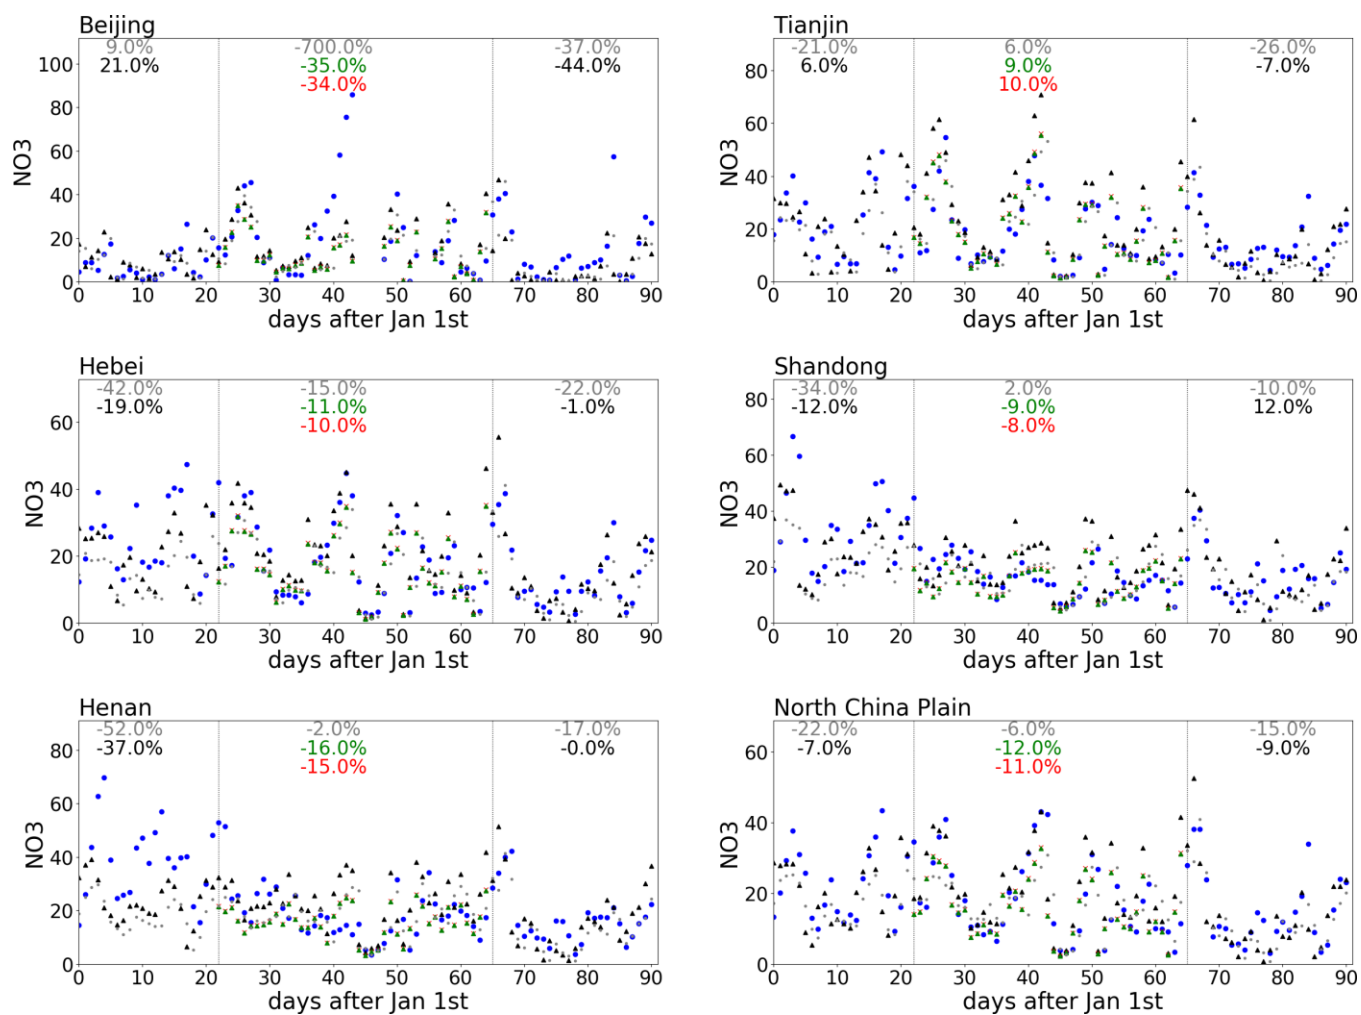

**Figure S6** Same as Figure S5 but in 2020

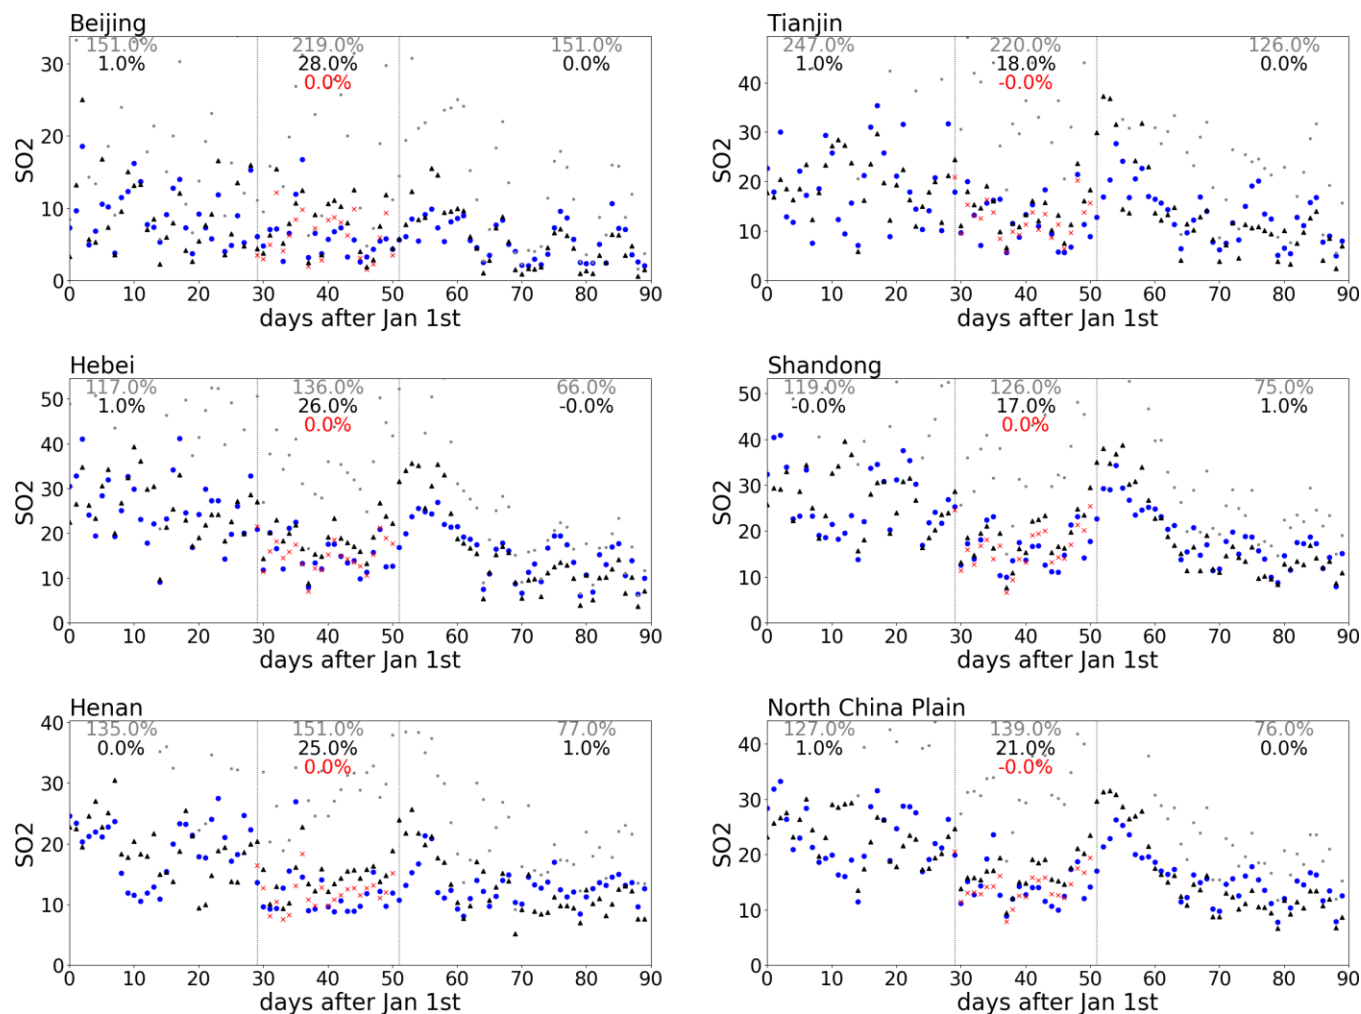

39

40 **Figure S7** Comparison of the simulated average concentrations of SO<sub>2</sub> in NCP (the percentage numbers  
 41 indicate the normalized mean biases in hypothesis and actual simulations respectively for Period 2. Blue  
 42 dots: observations; Black dots: simulations using adjusted emission with no consideration of shutdown  
 43 influences; Red dots: simulations using adjusted emission with consideration of shutdown influences;  
 44 unit: Grey dots: original simulation without assimilation; μg m<sup>-3</sup>)

45



46

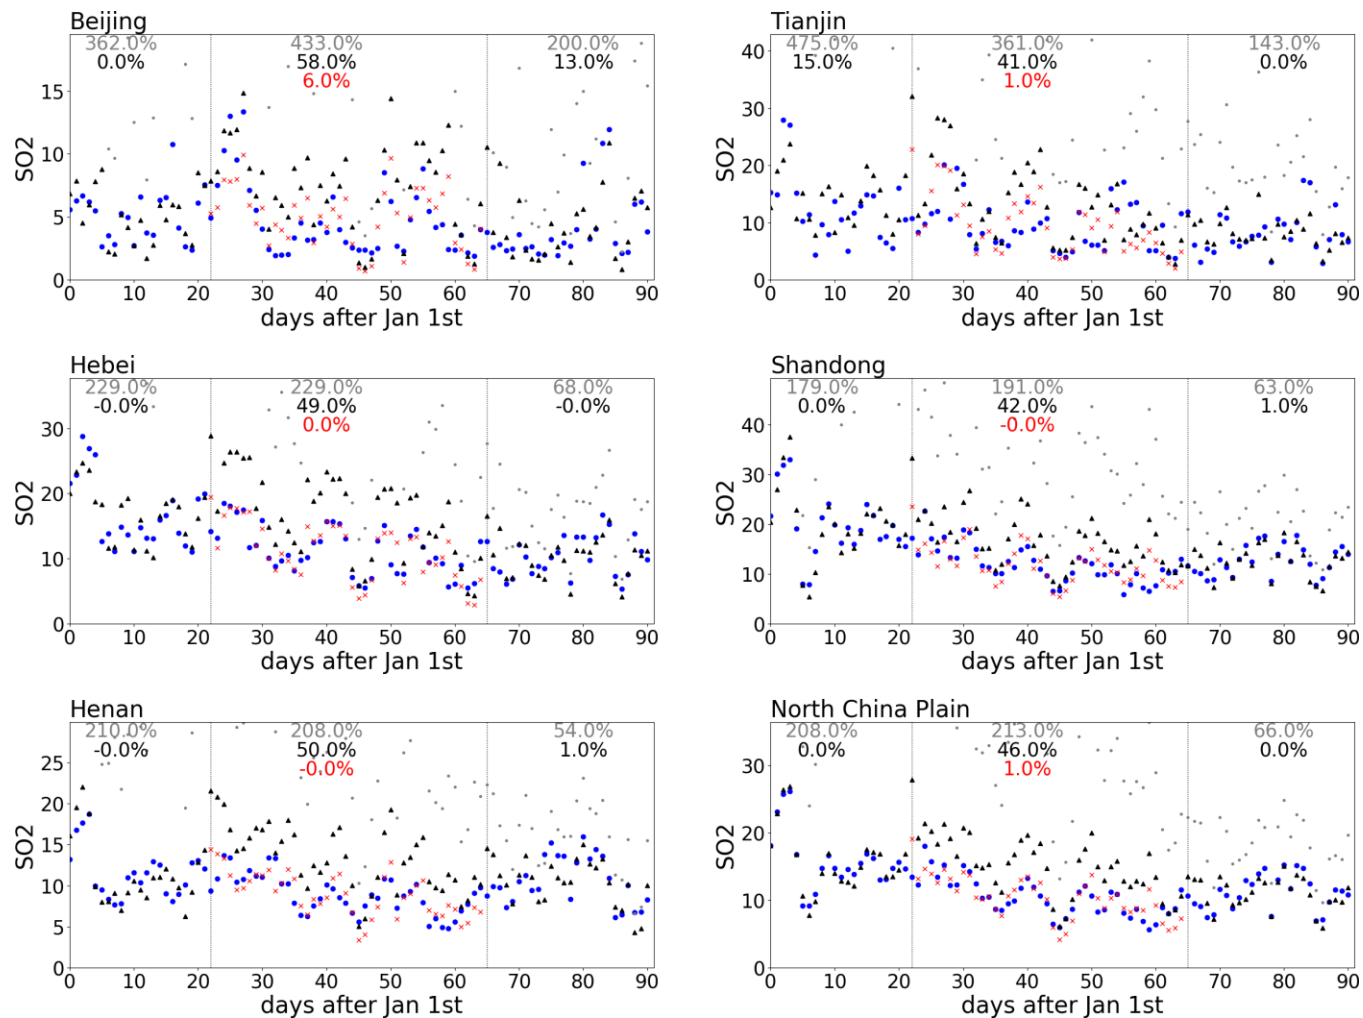

47

48

**Figure S8** Same as Figure S7 but in 2020

49

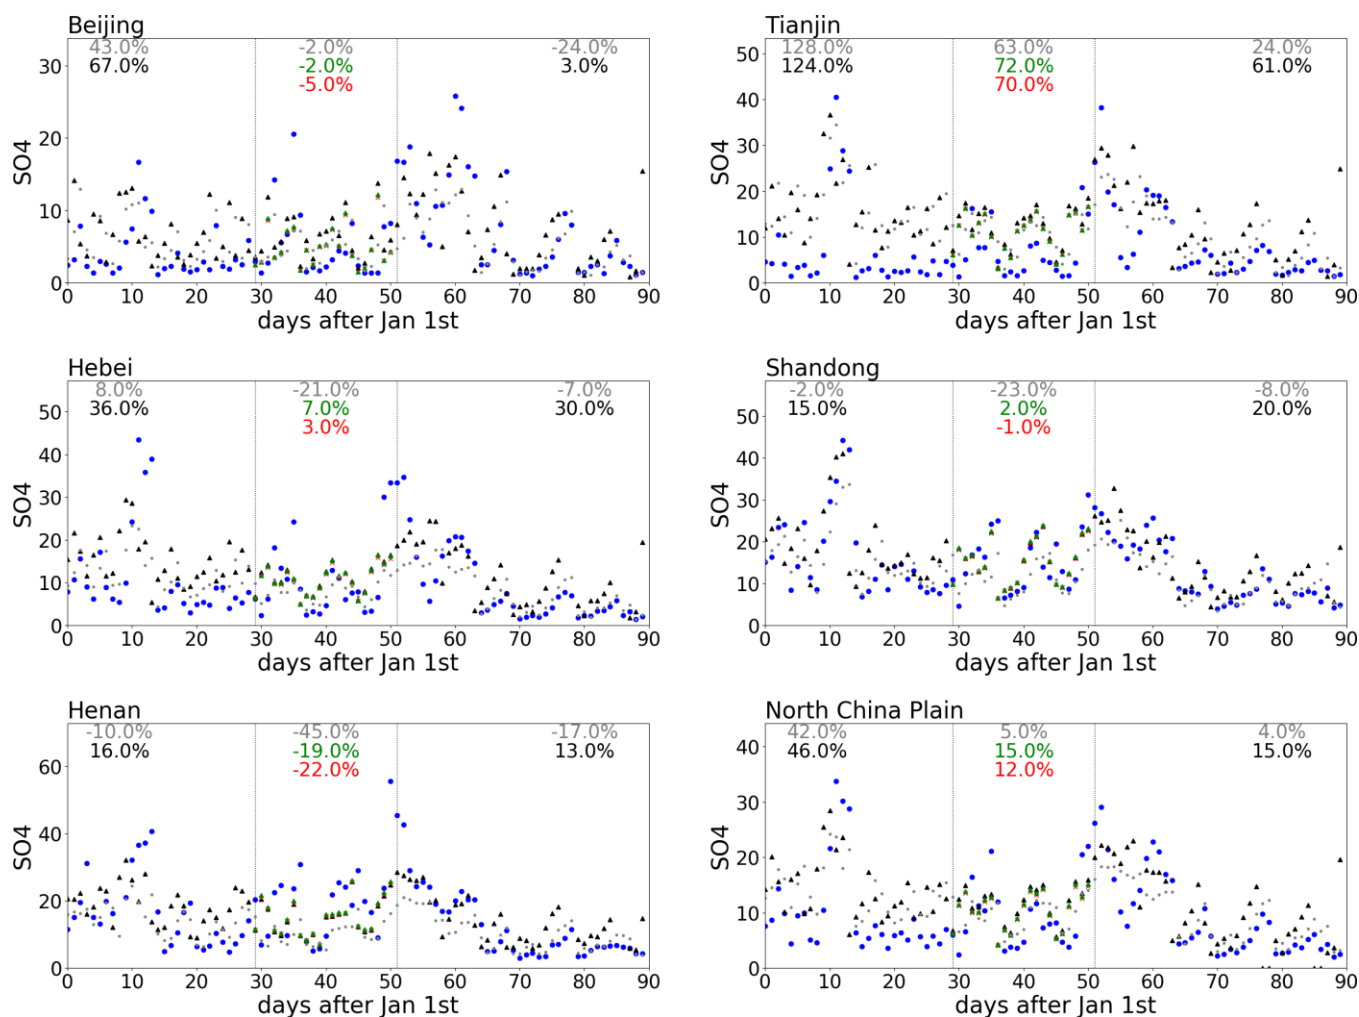

**Figure S9** Comparison of the simulated average concentrations of  $\text{SO}_4^{2-}$  in NCP (the percentage numbers indicate the normalized mean biases in hypothesis and actual simulations respectively for Period 2. Blue dots: observations; Black dots: simulations using adjusted emission with no consideration of shutdown influences; Red dots: simulations using adjusted emission with consideration of shutdown influences; Green dots: simulations using adjusted emission with consideration of shut-down influences but without  $\text{SO}_2$ ; Grey dots: original simulation without assimilation; unit:  $\mu\text{g m}^{-3}$ )

57

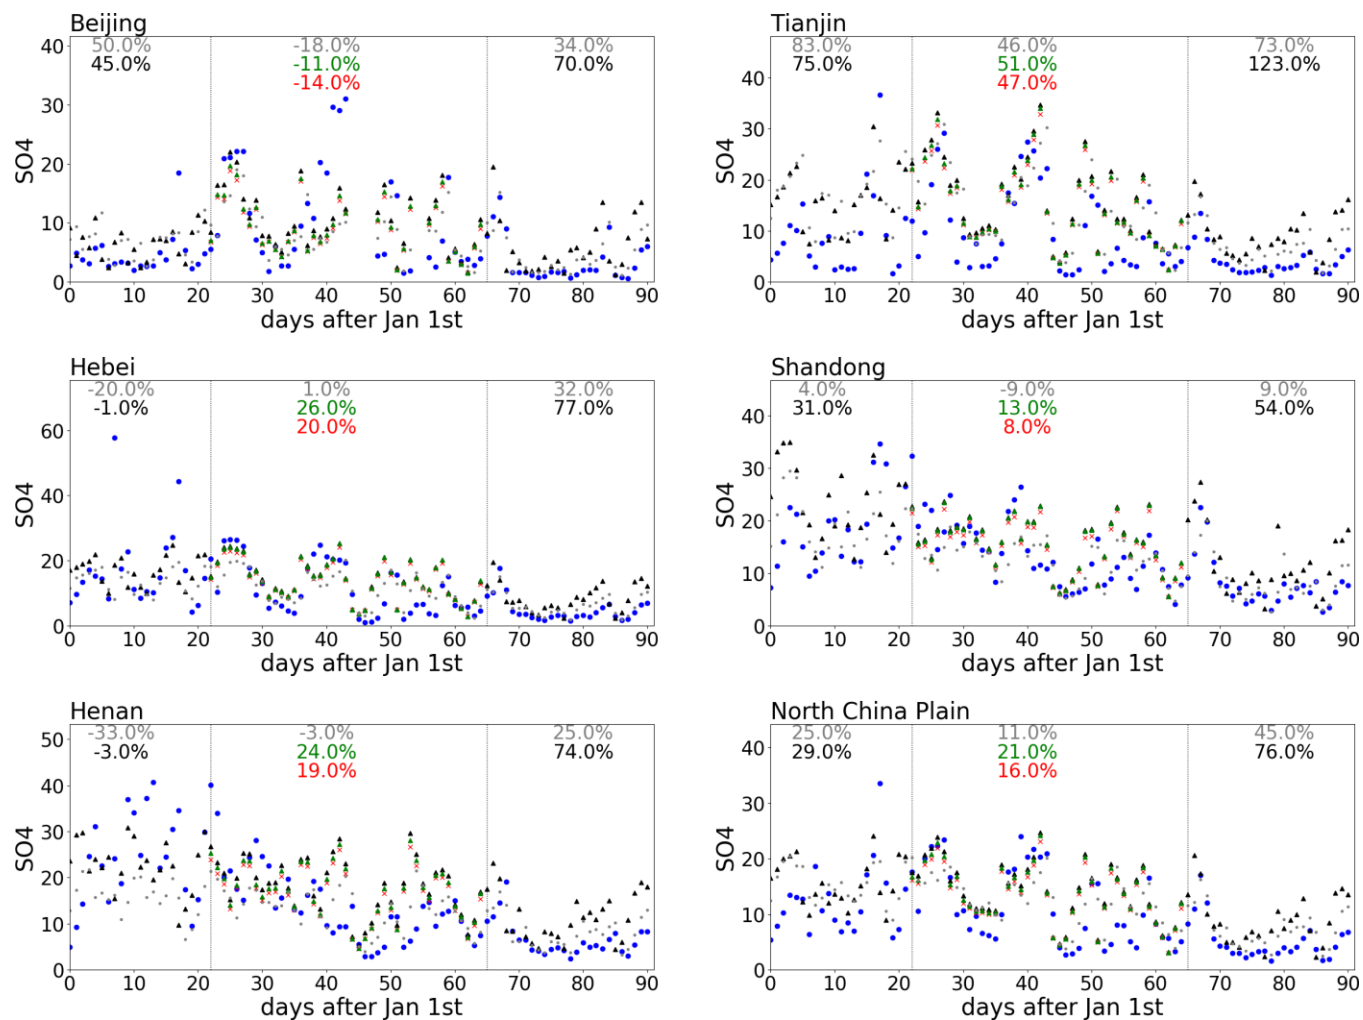

58

59

**Figure S10** Same as Figure S9 but in 2020

60

61

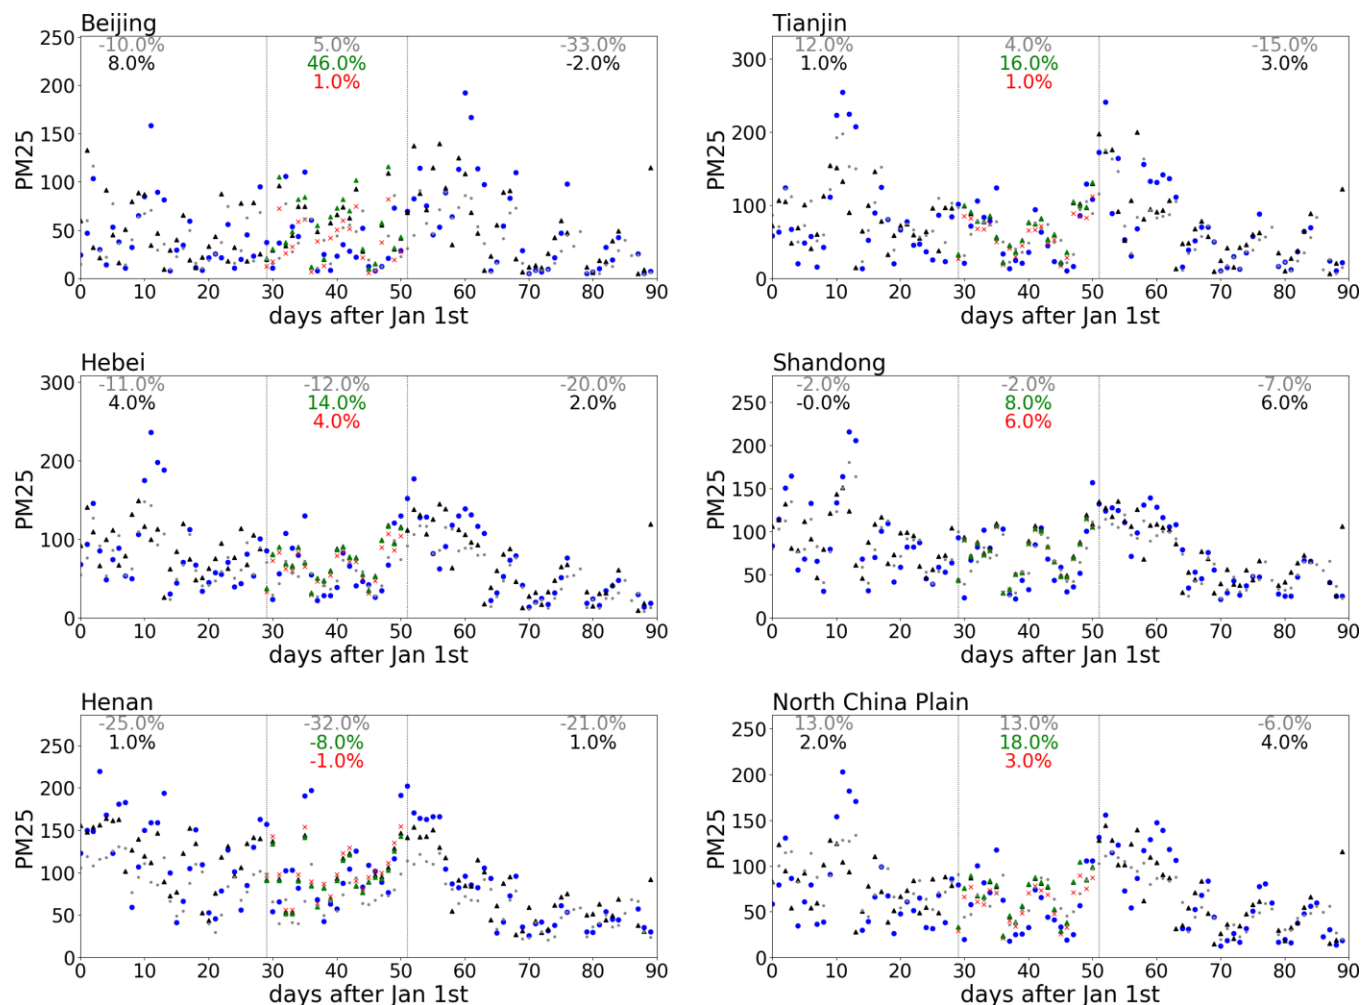

62

63

**Figure S11** Comparison of the simulated average concentrations of PM<sub>2.5</sub> in NCP (the percentage numbers indicate the normalized mean biases in hypothesis and actual simulations respectively for Period 2. Blue dots: observations; Black dots: simulations using adjusted emission with no consideration of shutdown influences; Red dots: simulations using adjusted emission with consideration of shutdown influences; Green dots: simulations using adjusted emission with consideration of shut-down influences but without primary PM<sub>2.5</sub>; Grey dots: original simulation without assimilation; unit:  $\mu\text{g m}^{-3}$ )

70

71

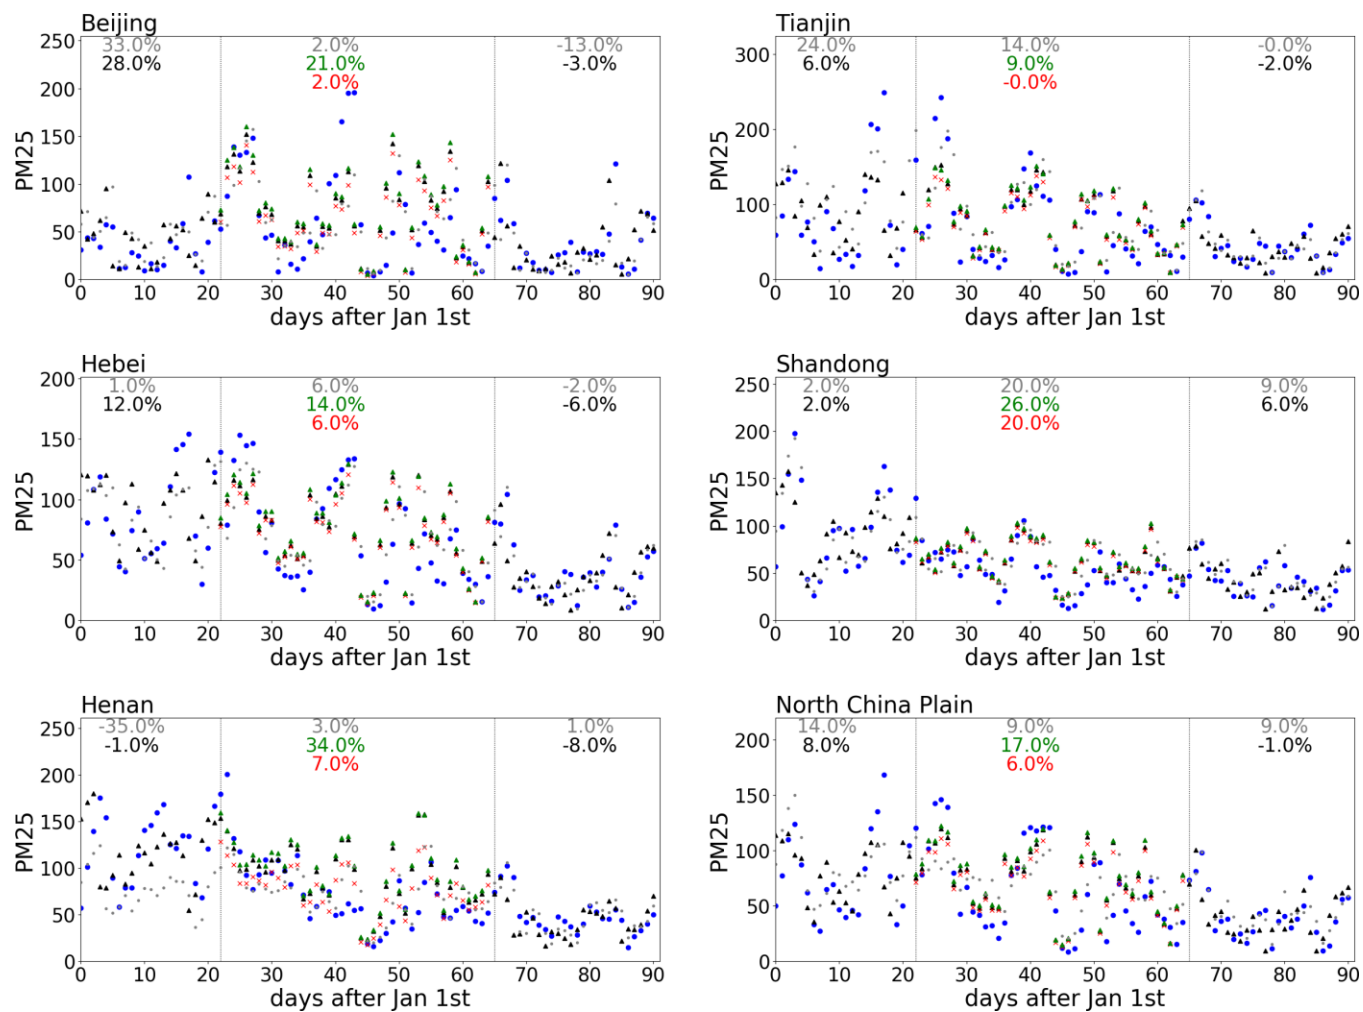

72

73

**Figure S12** Same as Figure S11 but in 2020

74

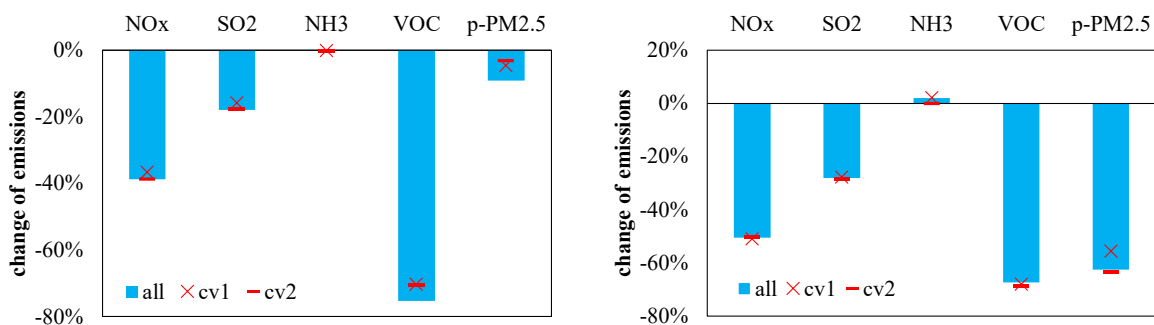

76 **Figure S13.** Comparison of estimated percent changes in emissions due to the shutdown in Period 2  
 77 from cross-validation (cv1-cross validation #1 by using randomly selected half of the observation sites  
 78 in each province for correction; cv2-cross validation #2 by using the rest half of the observation sites in  
 79 cv1 for correction; all-used all observation sites)
